# Supplementary material
Source: PubMed Central journal article supplement (PMC6289069)
Supplement: NIHMS991924-supplement-supplemental_Table.pdf [file NIHMS991924-supplement-supplemental_Table.pdf]

## Supplementary Table 1

### Characteristics of HIV-viremic individuals grouped by race

|                                                 | Black                   | Non-black                |
|-------------------------------------------------|-------------------------|--------------------------|
| N                                               | 46                      | 45                       |
| Age, years*                                     | 35 (20-66)              | 35 (21-58)               |
| Gender, N (F/M)                                 | 10/36                   | 3/42                     |
| N, early/chronic viremia                        | 7/39                    | 9/36                     |
| CD4 <sup>+</sup> T-cell count (cells/ $\mu$ l)* | 494 (45-1828)           | 458 (77-1150)            |
| HIV RNA (copies/ml plasma) <sup>†</sup>         | 7,150<br>(3,746-13,645) | 14,111<br>(7,127-27,938) |

\*Median (range)

<sup>†</sup>Geometric mean (95% CI)
